# Supplementary material for: MicroRNA-221 promotes cisplatin resistance in osteosarcoma cells by targeting PPP2R2A
Source: Oxford University Press journal article supplement (doi:10.1042/bsr20190198), 2019-06-20

## miR-221 Expressions

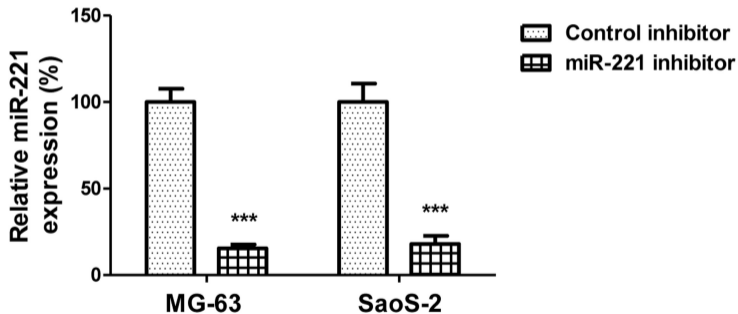

**A**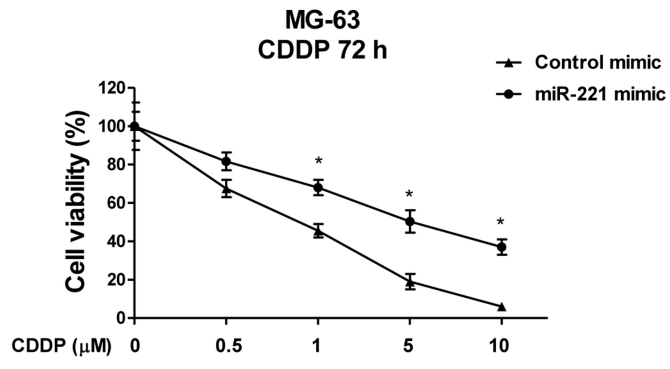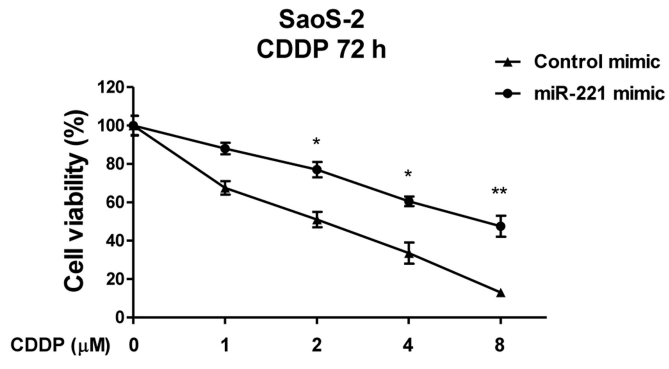**B**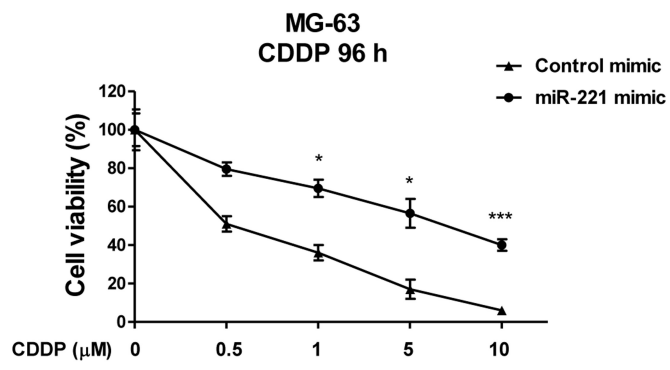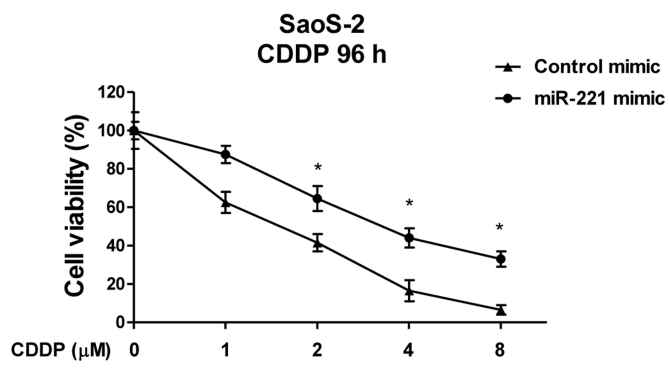**C**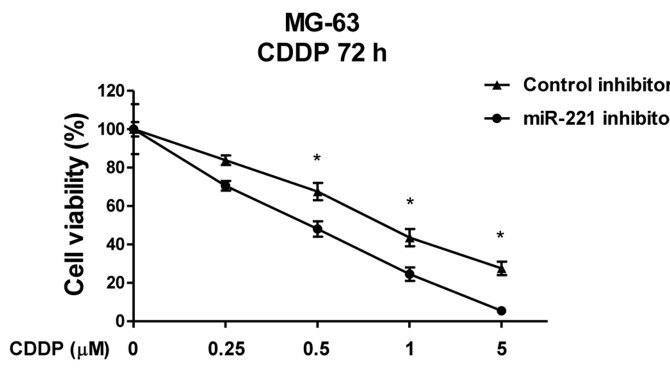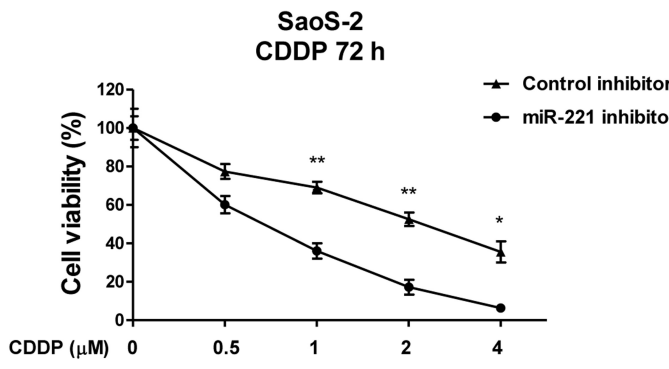**D**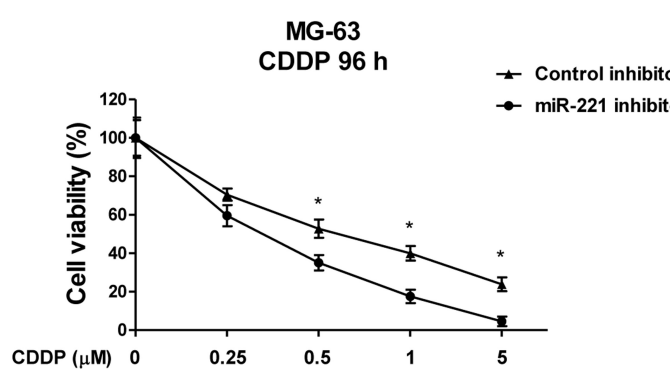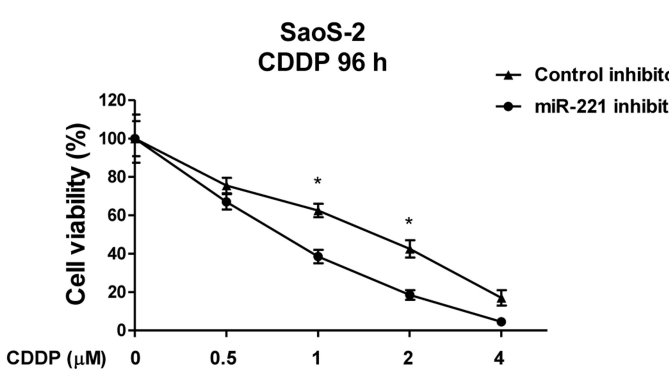

**A**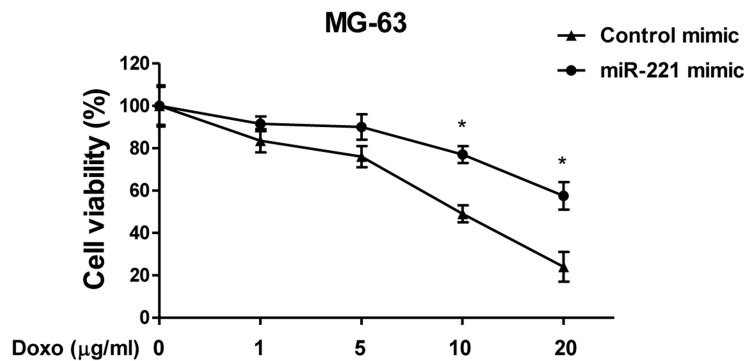**B**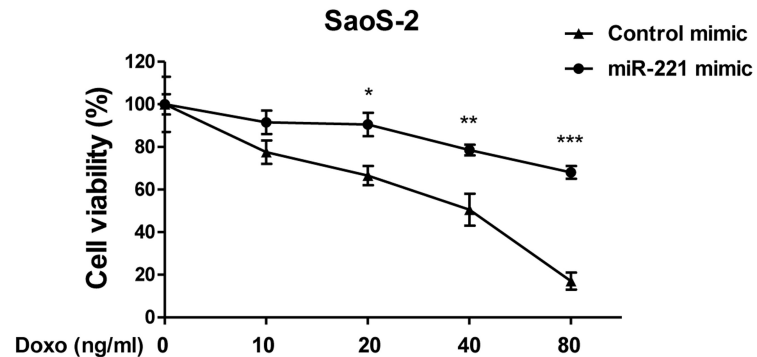**C**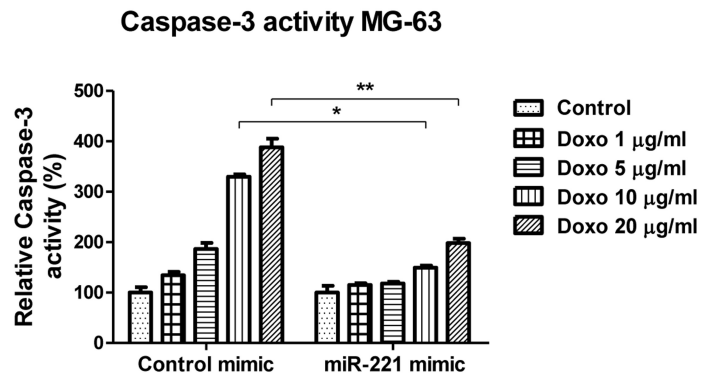**D**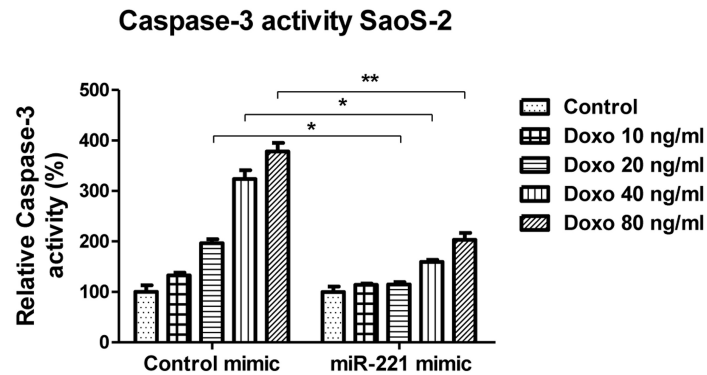

Supplement: bsr-2019-0198_supp.pdf [file bsr-2019-0198_supp.pdf]
